# Supplementary material for: Biofilters and bioretention systems: the role of biochar in the blue-green city concept for stormwater management
Source: Royal Society of Chemistry journal article supplement (doi:10.1039/d3ew00054k), 2023-01-01
Supplement: d3ew00054k1.pdf [file d3ew00054k1.pdf]

## Supplementary Material

### **Biofilters and bioretention systems: The role of biochar in blue green city concept for stormwater management**

K.S.D. Premarathna<sup>1</sup>, Jayanta Kumar Biswas<sup>2</sup>, Manish Kumar<sup>3</sup>, Sunita Varjani<sup>4</sup>, Bede Mickan<sup>5</sup>, Pau Loke Show<sup>6</sup>, John Lau Sie Yon<sup>7</sup>, Luís A. B. Novo<sup>8</sup>, Meththika Vithanage<sup>1,3,5\*</sup>

<sup>1</sup>*Ecosphere Resilience Research Center, University of Sri Jayewardenepura, Nugegoda, Sri Lanka*

<sup>2</sup>*Enviromicrobiology, Ecotoxicology and Ecotechnology Research Laboratory (3E-MicroToxTech Lab), Department of Ecological Studies, and International Centre for Ecological Engineering, University of Kalyani, Kalyani, Nadia- 741235, West Bengal, India*

<sup>3</sup>*Sustainability Cluster, School of Engineering, University of Petroleum and Energy Studies, Dehradun, Uttarakhand 248007, India*

<sup>4</sup>*Gujarat Pollution Control Board, Gandhinagar 382010, Gujarat, India*

<sup>5</sup>*The UWA Institute of Agriculture, University of Western Australia, Perth WA6009, Australia*

<sup>6</sup>*Department of Chemical and Environmental Engineering, University of Nottingham, 43500 Semenyih, Selangor Darul Ehsan, Malaysia*

<sup>7</sup>*Department of Chemical and Energy Engineering, Curtin University, 98009 Miri Sarawak, Malaysia*

<sup>8</sup>*Scotland's Rural College (SRUC), West Mains Road, The King's Buildings, EH9 3JG Edinburgh, United Kingdom*

\*Corresponding Author: meththika@sjp.ac.lk

Table S1: Summary of usage of pristine biochar for the removal of contaminants from stormwater

| Feedstock      | Temperature/ °C                                                                        | Target contaminant                                                                                                                                | Observations                                                                                                                                                                                                                                                                                                                                                                                                                                                                                                       | Inference                                                                                                                                                                                                     | Reference                  |
|----------------|----------------------------------------------------------------------------------------|---------------------------------------------------------------------------------------------------------------------------------------------------|--------------------------------------------------------------------------------------------------------------------------------------------------------------------------------------------------------------------------------------------------------------------------------------------------------------------------------------------------------------------------------------------------------------------------------------------------------------------------------------------------------------------|---------------------------------------------------------------------------------------------------------------------------------------------------------------------------------------------------------------|----------------------------|
| Wood           | 900 – 1000<br><br><hr style="width: 15%; margin-left: auto; margin-right: 0;"/><br>550 | Total ammonia nitrogen (TAN), NO <sub>3</sub> <sup>-</sup> -N and NO <sub>2</sub> <sup>-</sup> -N ,dissolved organic carbon (DOC), <i>E. coli</i> | After 4 days of recirculation TAN concentration in effluents from sand, biochar (900 -1000 °C), and biochar (550 °C) reduced by 48%, 65%, and 67% respectively<br><br>After 4 days of recirculation NO <sub>x</sub> concentration in effluents of sand, biochar (900 -1000 °C), and biochar (550 °C) increased by 261%, 253%, and 84% respectively<br><br><i>E coli</i> concentration in effluents from biochar (900 – 1000 °C) is below the detection limit and it is higher in biochar (550°C) than that of sand | Higher CEC and specific surface area<br><br>Nitrification in each column and the simultaneous nitrification-denitrification occurring in biochar (550 °C) amended columns<br><br>High surface area of biochar | Rahman et al. <sup>1</sup> |
| Pine wood (PW) | -                                                                                      | TorC                                                                                                                                              | TorCs removal of all biochar amended columns more than 99% (Effluent concentration less than 0.1 µg/l)                                                                                                                                                                                                                                                                                                                                                                                                             | Small particle size of biochar provide more surface area for adsorption of TorC                                                                                                                               | Ulrich et al. <sup>2</sup> |

|           |               |                                                                                           |                                                                                                                                                                                                                                                                                          |                                                                                                                                                                                                                                                                                                                                                                             |                            |
|-----------|---------------|-------------------------------------------------------------------------------------------|------------------------------------------------------------------------------------------------------------------------------------------------------------------------------------------------------------------------------------------------------------------------------------------|-----------------------------------------------------------------------------------------------------------------------------------------------------------------------------------------------------------------------------------------------------------------------------------------------------------------------------------------------------------------------------|----------------------------|
| Wood dust | 300, 500, 700 | BPA                                                                                       | <p>Fixed bed columns containing biochar produced at 700 °C removed BPA more efficiently than biochar non amended columns and other biochar amended columns</p> <p>Adsorption efficiency decreased at high humic acid concentrations</p> <p>Highest adsorption observed at neutral pH</p> | <p>High surface area and pore volume of biochar</p> <p>Humic acid compete with BPA for pores and block biochar' pores and reduce number of effective sites available for BPA to bind</p> <p>At high pH's promote dissociation of carboxylic groups in biochar surface and dissociate carboxyl groups in BPA and make it hydrophilic so hydrophobic interactions reduced</p> | Lu and Chen <sup>3</sup>   |
| Reef soil | 550           | P, NH <sub>4</sub> -N, NO <sub>3</sub> <sup>-</sup> -N, total nitrogen (TN <sub>b</sub> ) | <p>Peak flow rate and cumulative runoff volume decreased in biochar amended strips</p> <p>No significant difference in concentrations of any pollutant (P, NH<sub>4</sub>-N, NO<sub>3</sub>-N or TN<sub>b</sub>) in surface water samples from biochar amended and un-amended</p>        | High water retention ability of biochar                                                                                                                                                                                                                                                                                                                                     | Imhoff et al. <sup>4</sup> |
| PW        | -             |                                                                                           |                                                                                                                                                                                                                                                                                          |                                                                                                                                                                                                                                                                                                                                                                             |                            |

|                                                                        |            |                |                                                                                                                                   |                                                                                                                 |                                |
|------------------------------------------------------------------------|------------|----------------|-----------------------------------------------------------------------------------------------------------------------------------|-----------------------------------------------------------------------------------------------------------------|--------------------------------|
|                                                                        |            |                | Only NO <sub>3</sub> -N or TN <sub>b</sub> concentrations of subsurface water was lower in samples below the biochar amended soil |                                                                                                                 |                                |
| Softwood with bark                                                     | 815 – 1315 | <i>E. coli</i> | In all the biochar amended columns removal of <i>E. coli</i> was higher than the sand only column                                 | Overall increase of attraction forces (hydrophobic and steric interactions)                                     | Mohanty and Boehm <sup>5</sup> |
|                                                                        |            |                | Remobilization of deposited <i>E. Coli</i> during intermittent flow was lower in biochar amended columns                          | Rough surface and irregular shape of biochar promote bacterial attachment via straining                         |                                |
| Wood chips<br>(commercially available)                                 | 350        | <i>E. coli</i> | Removal efficiency 3 times higher than sand                                                                                       | Overall increase of attachment sites                                                                            | Mohanty et al. <sup>6</sup>    |
|                                                                        | 700        |                | Reduced the mobilization during the intermittent flow                                                                             | Increase of overall attractive forces between bacteria surface and grain surface                                |                                |
|                                                                        |            |                |                                                                                                                                   | Hydrophobic forces increased water holding capacity or decreased intrusion of air during gravitational drainage |                                |
| A blended mix of wood species<br>60% Monterey Pine,<br>20% Eucalyptus, | 180 – 395  | <i>E. coli</i> | Biochar-modified sand biofilters show enhanced <i>E. coli</i> removal compared to sand under all experimental conditions          | Higher specific surface area, surface roughness and hydrophobicity of biochar                                   | Afroz and Boehm <sup>7</sup>   |
|                                                                        |            |                | Retention of <i>P. aeruginosa</i> by biochar-                                                                                     |                                                                                                                 |                                |

|                                                                                                                                    |     |                                                                                                            |                                                                                                                                                                                                                                                        |                                                                                                                                                                                                          |                            |
|------------------------------------------------------------------------------------------------------------------------------------|-----|------------------------------------------------------------------------------------------------------------|--------------------------------------------------------------------------------------------------------------------------------------------------------------------------------------------------------------------------------------------------------|----------------------------------------------------------------------------------------------------------------------------------------------------------------------------------------------------------|----------------------------|
| 10% Bay Laurel,<br>10% mixed hardwood<br>and softwood                                                                              |     |                                                                                                            | amended sand column is higher than the<br>pure sand columns<br>Injecting <i>E. coli</i> loaded stormwater to the<br>biofilm-coated biochar-amended sand<br>columns not showed observable ATP<br>densities in the columns                               | Contribution of ATP from <i>E. coli</i><br>retention is insignificant compared to<br>the ATP from the <i>P. aeruginosa</i><br>biofilm                                                                    |                            |
| Silvergrass<br>( <i>Miscanthus</i> sp.)                                                                                            | -   | <i>P, E. coli</i>                                                                                          | Average removal of <i>E. coli</i> by biochar<br>amended columns higher than that of sand<br>column and increased with the experiment<br>time<br>Removal of P higher in biochar amended<br>columns than that of sand columns                            | The increased biological activity and<br>the additional degradation at the deeper<br>zones of filter<br>High adsorption capacity of biochar<br>due to porous structure                                   | Kaetzl et al. <sup>8</sup> |
| A blended mix of<br>wood species<br>60% Monterey Pine,<br>20% Eucalyptus,<br>10% Bay Laurel,<br>10% mixed hardwood<br>and softwood | 394 | <i>E. coli</i>                                                                                             | Biochar-amended biofilters showed<br>enhancement in <i>E. coli</i> removal during the<br>first 31 weeks of conditioning over sand<br>biofilters and media type did not influence<br><i>E. coli</i> removal during the last 30 weeks of<br>conditioning | High organic carbon content promotes<br>hydrophobic interactions between<br>bacteria and biochar surface<br>Provide additional attachment sites to<br>bacteria and virus due to its high<br>surface area | Kraner et al. <sup>9</sup> |
| Bamboo chips                                                                                                                       | 600 | NH <sub>4</sub> <sup>+</sup> -N, NO <sub>3</sub> <sup>-</sup> -N,<br>NO <sub>2</sub> <sup>-</sup> -N or TN | Removal of large molecule organic<br>contaminants increased with the addition of                                                                                                                                                                       | Presence of considerable number of<br>surface functional groups and large                                                                                                                                | Pan et al. <sup>10</sup>   |

|            |            |                                                      |                                                                                                                                                                                                                           |                                                                                                                                                                                                                                                                                                                                                                                                                                                                                                                                                      |                             |
|------------|------------|------------------------------------------------------|---------------------------------------------------------------------------------------------------------------------------------------------------------------------------------------------------------------------------|------------------------------------------------------------------------------------------------------------------------------------------------------------------------------------------------------------------------------------------------------------------------------------------------------------------------------------------------------------------------------------------------------------------------------------------------------------------------------------------------------------------------------------------------------|-----------------------------|
|            |            |                                                      | <p>biochar</p> <p>Biochar amended biofilters increased the removal efficiencies of <math>\text{NH}_4^+</math>-N, TN, <math>\text{NO}_2^-</math>-N</p> <p><math>\text{NO}_3^-</math>-N was accumulated in the effluent</p> | <p>surface area of biochar</p> <p>Good pore structure provide adequate surface area for the growth and reproduction of microorganisms and enhance the number of denitrifying microorganisms</p> <p>Biochar act as a supplementary carbon source for microorganisms involved in denitrification</p> <p>High concentration of dissolved oxygen due to addition of biochar provided aerobic environment to facilitate the growth of nitrifying bacteria who enhanced the conversion of <math>\text{NO}_2^-</math>-N to <math>\text{NO}_3^-</math>-N</p> |                             |
| Wood chips | 700 – 1000 | Dissolved organic nitrogen (DON), TAN, $\text{NO}_x$ | Column contained the highest amount of biochar (BC-50%) showed higher TAN removal efficiency than column with low biochar amount (BC-20%)                                                                                 | Increase of surface charge availability for adsorption $\text{NH}_4^+$ due to the high amount of biochar in the column, $\text{Ca}^{2+}$ , $\text{Mg}^{2+}$ , $\text{Al}^{3+}$ , $\text{Fe}^{2+}$ available in the dairy runoff compete with $\text{NH}_4^+$ for adsorption sites of BC-20%                                                                                                                                                                                                                                                          | Rahman et al. <sup>11</sup> |

|                            |               |                     |                                                                                                                                                                                                                                                                                               |                                                                                          |                           |
|----------------------------|---------------|---------------------|-----------------------------------------------------------------------------------------------------------------------------------------------------------------------------------------------------------------------------------------------------------------------------------------------|------------------------------------------------------------------------------------------|---------------------------|
|                            |               |                     | Higher DON removal by BC-50% than BC-20%                                                                                                                                                                                                                                                      | Greater ammonification and nitrification-denitrification due to high adsorption capacity |                           |
|                            |               |                     | Greater TN adsorption by BC-50% than BC-20%                                                                                                                                                                                                                                                   | Enhanced adsorption, ammonification, nitrification and denitrification                   |                           |
| Poultry litter (PL)        | 300, 400, 500 | $\text{NH}_4^+$ - N | Water retention capacity of PL-300 and SYP biochar is high relative to sand filter<br>$\text{NH}_4^+$ - N adsorption capacity of PL-400 and PL-500 is higher than that of SYP biochar                                                                                                         | Additional pour volume of biochar<br>High CEC of PL biochar                              | Tian et al. <sup>12</sup> |
| Southern yellow pine (SYP) | 550           |                     |                                                                                                                                                                                                                                                                                               |                                                                                          |                           |
| PL                         | 400, 500      | $\text{NH}_4^+$     | PL biochar adsorbed more $\text{NH}_4^+$ than that of HW biochar<br>PL-400 biochar sorbed more $\text{NH}_4^+$ than the PL-500 biochar<br>Column with 10% biochar removed more than 90% of $\text{NH}_4^+$ than the sand only column<br>Cation exchange is the dominated adsorption mechanism | High CEC of biochar produced at low pyrolysis temperatures                               | Tian et al. <sup>13</sup> |
| Hardwood pellets (HW)      |               |                     |                                                                                                                                                                                                                                                                                               |                                                                                          |                           |

|                           |       |                                                                                      |                                                                                                                                                                                              |                                                                                                                                                                                            |                             |
|---------------------------|-------|--------------------------------------------------------------------------------------|----------------------------------------------------------------------------------------------------------------------------------------------------------------------------------------------|--------------------------------------------------------------------------------------------------------------------------------------------------------------------------------------------|-----------------------------|
| PW                        | >1100 | TorCs                                                                                | TorC adsorption capacity of sand columns amended with PW-1100 biochar higher than that of PW-600 biochar                                                                                     | High surface area and pore volume                                                                                                                                                          | Ulrich et al. <sup>14</sup> |
|                           | >600  |                                                                                      |                                                                                                                                                                                              |                                                                                                                                                                                            |                             |
| Spent coffee ground (SCG) | 400   | Caffeine (CAF), Atrazine (ATR), Diuron(DIU), Fipronil (FIP), Pentachlorophenol (PCP) | SCG adsorbed 15 – 25 % of CAF, ATR, and PCP and 60 – 90 % of DIU and FIP<br>The removal efficiencies TOrCs decreased when exposed to mixed contaminants, except the highly hydrophobic TOrC. | The competition between multiple contaminants for binding sites reduce the removal efficiency                                                                                              | Redden <sup>15</sup>        |
| Wood waste                | 700   | Cu, Cd, Zn, Ni                                                                       | Overall removal efficiency of metals<br>Cu – 80 – 100%<br>Cd – 41.1 – 100%<br>Ni – 44.4 – 84%<br>Zn – 51.6 – 100%                                                                            | High BET surface area and pore volume facilitated adsorption<br>The pH of outflow was slightly higher than the stormwater which reduce solubility of metals and enhance removal efficiency | Sun et al. <sup>16</sup>    |



Table S2: Summary of usage of modified biochar for the removal of contaminants from stormwater

| Feedstock           | Modifier                       | Temperature/ °C | Target contaminant | Observations                                                                                                                                                                                           | Inference                                                                       | Reference                      |
|---------------------|--------------------------------|-----------------|--------------------|--------------------------------------------------------------------------------------------------------------------------------------------------------------------------------------------------------|---------------------------------------------------------------------------------|--------------------------------|
| Forestry wood waste | H <sub>2</sub> SO <sub>4</sub> | 700             | <i>E. coli</i>     | Removal percentage of E Coli by raw biochar was 96.6% and H <sub>2</sub> SO <sub>4</sub> modification exceeded the removal efficiency of raw biochar slightly and minimized remobilization of bacteria | High surface area, porous structure and, surface characteristics of the biochar | Lau et al. <sup>17</sup>       |
|                     | H <sub>3</sub> PO <sub>4</sub> |                 |                    | H <sub>3</sub> PO <sub>4</sub> and KOH modification has little influence on removal efficiency of <i>E. coli</i>                                                                                       | High surface hydrophobicity of biochar                                          | Due to presence of more oxygen |

|    |       |     |                    |                                                                                                                                                                                                                                                                                                                                                            |                                                                                                                                                                                                                                                                                                                                                                                                       |                    |
|----|-------|-----|--------------------|------------------------------------------------------------------------------------------------------------------------------------------------------------------------------------------------------------------------------------------------------------------------------------------------------------------------------------------------------------|-------------------------------------------------------------------------------------------------------------------------------------------------------------------------------------------------------------------------------------------------------------------------------------------------------------------------------------------------------------------------------------------------------|--------------------|
|    | KOH   |     |                    | <i>E. coli</i> removal efficiency of amino modified biochar was 92.1% lower than other biochar yet higher than the sand only column                                                                                                                                                                                                                        | containing functional groups surface become polar and prevent hydrophobic bacteria                                                                                                                                                                                                                                                                                                                    |                    |
|    | Amino |     |                    |                                                                                                                                                                                                                                                                                                                                                            |                                                                                                                                                                                                                                                                                                                                                                                                       |                    |
| PW | nZVI  | 600 | As, Cd, Cu, Pb, Zn | As, Cd, Cu, Pb and Zn removal efficiency of homogeneous mixture of biochar 95%, 93%, 99%, 98% and 95% respectively<br>As, Cd, Cu, Pb and Zn removal efficiency of biochar layered sand 96%, 99%, 100%, 100% and 99% respectively<br>As, Cd, Cu, Pb and Zn removal efficiency of nZVI modified biochar layered sand 98%, 90%, 99%, 99% and 94% respectively | High surface area provide more sites for adsorption of Cu<br>Complexation with active surface functional groups, cation exchange and precipitation<br>As adsorption via surface complexation with hydroxide groups and intraparticle diffusion onto nZVI biochar complexes<br>Cd adsorption by biochar mainly via cation exchange, surface complexation, precipitation and electrostatic interactions | Hasan et al.<br>18 |
| PW | nZVI  | 600 | Cu, Cd             | Percentage removal of Cu by sand, sand-                                                                                                                                                                                                                                                                                                                    | Metals interacted with biochar via                                                                                                                                                                                                                                                                                                                                                                    | Hasan et al.       |

|            |     |                                |                |                                                                                                                                                                                         |                                                                                                                                                                                                                                                                            |                          |
|------------|-----|--------------------------------|----------------|-----------------------------------------------------------------------------------------------------------------------------------------------------------------------------------------|----------------------------------------------------------------------------------------------------------------------------------------------------------------------------------------------------------------------------------------------------------------------------|--------------------------|
|            |     |                                |                | biochar and sand-nZVI biochar was over 99%<br>Percentage removal of Cd and Zn by sand-nZVI biochar was significantly high compared to pure sand column and raw biochar amended columns. | chemical reduction and surface complexation with functional groups of biochar and the iron oxide C-O and COOH groups on biochar transformed to C-O-Fe producing adsorption sites for metals                                                                                | <sup>19</sup>            |
| Wood waste | 700 | H <sub>2</sub> SO <sub>4</sub> | Cu, Cd, Zn, Ni | Only effective for Cu removal, efficiencies were 67.9 -97.9% and 99.6 – 100%                                                                                                            | Increased BET surface area and total pore volume due to H <sub>2</sub> SO <sub>4</sub> modification<br>Low pH of outflow reduce removal efficiency of metals                                                                                                               | Sun et al. <sup>16</sup> |
| Oak trees  | 285 | Al                             | As             | Adsorption capacity of As by Al impregnated biochar was significantly higher than that of pristine biochar. Adsorption of As increased with the increase of impregnated amount of Al    | Available adsorption sites for As increased with the increase of Al content<br>As adsorption occurred via interactions between Al(OH) <sub>3</sub> on biochar surface and arsenate in water.<br>Main mechanisms involved are electrostatic attractions and ligand exchange | Liu et al. <sup>20</sup> |

---

|     |     |     |                                   |                                                                                                                                                                                                |                                                                                             |                      |
|-----|-----|-----|-----------------------------------|------------------------------------------------------------------------------------------------------------------------------------------------------------------------------------------------|---------------------------------------------------------------------------------------------|----------------------|
| SCG | 400 | KOH | CAF, ATR,<br>PCP, DIU, and<br>FIP | Removed all contaminants present in the individual contaminant matrix<br>Removed all TOrCs completely without exhibiting any preference for highly hydrophobic in the mixed contaminant matrix | High surface area, high porosity, and strong surface charge improve the adsorption of TOrCs | Redden <sup>15</sup> |
|-----|-----|-----|-----------------------------------|------------------------------------------------------------------------------------------------------------------------------------------------------------------------------------------------|---------------------------------------------------------------------------------------------|----------------------|

---

## References

1. M. Y. A. Rahman, M. H. Nachabe and S. J. Ergas, *Bioresource Technology*, 2020, **310**, 123428.
2. B. A. Ulrich, M. Loehnert and C. P. Higgins, *Environmental Science: Water Research & Technology*, 2017, **3**, 726-734.
3. L. Lu and B. Chen, *Environmental Pollution*, 2018, **243**, 1539-1549.
4. P. T. Imhoff, Culver, T. B. & Chiu, P. C., *Removing Nitrate from Stormwater with Biochar Amendment to Roadway Soils*, 2019.
5. S. K. Mohanty and A. B. Boehm, *Environmental Science & Technology*, 2014, **48**, 11535-11542.
6. S. K. Mohanty, K. B. Cantrell, K. L. Nelson and A. B. Boehm, *Water research*, 2014, **61**, 288-296.
7. A. R. M. N. Afrooz and A. B. Boehm, *PLoS One*, 2016, **11**, e0167489.
8. K. Kaetzl, M. Lübken, E. Nettmann, S. Krimmler and M. Wichern, *Scientific Reports*, 2020, **10**, 1229.
9. B. P. Kranner, A. Afrooz, N. J. M. Fitzgerald and A. B. Boehm, *PLoS One*, 2019, **14**, e0222719.
10. X. Pan, M. Chen, F. Wang and Q. Li, *Waste Management & Research*, 2020, **38**, 1176 – 1184.
11. M. Y. A. Rahman, R. Cooper, N. Truong, S. J. Ergas and M. H. Nachabe, *Chemosphere*, 2021, **283**, 130978.
12. J. Tian, S. Yi, P. T. Imhoff, P. C. Chiu, M.-X. Guo, J. A. Maresca, V. M. Beneski and S. H. Cooksey, presented in part at the World Environmental and Water Resources Congress 2014.
13. J. Tian, V. Miller, P. Chiu, J. Maresca, M. Guo and P. Imhoff, *The Science of the total environment*, 2016, **553**, 596-606.

14. B. A. Ulrich, E. A. Im, D. Werner and C. P. Higgins, *Environmental Science & Technology*, 2015, **49**, 6222-6230.
15. N. Redden, Master of Science in Civil Engineering, University of Washington, 2021.
16. Y. Sun, S. S. Chen, A. Y. T. Lau, D. C. W. Tsang, S. K. Mohanty, A. Bhatnagar, J. Rinklebe, K.-Y. A. Lin and Y. S. Ok, *Journal of Hazardous Materials*, 2020, **383**, 121243.
17. A. Y. T. Lau, D. C. W. Tsang, N. J. D. Graham, Y. S. Ok, X. Yang and X.-d. Li, *Chemosphere*, 2017, **169**, 89-98.
18. M. S. Hasan, R. Vasquez and M. Geza, *Processes*, 2021, **9**, 860.
19. M. S. Hasan, M. Geza, R. Vasquez, G. Chilkoor and V. Gadhamshetty, *Water, Air, & Soil Pollution*, 2020, **231**, 220.
20. Q. Liu, L. Wu, M. Gorrington and Y. Deng, *Journal of Environmental Engineering*, 2019, **145**, 04019008.
